# Supplementary material
Source: PubMed Central journal article supplement (PMC8033509)
Supplement: NIHMS1647666-supplement-1.pdf [file NIHMS1647666-supplement-1.pdf]

## Supplementary Material

### Methods:

#### *Esophageal biopsies and Histologic evaluation*

EoE histology scoring system (EoEHSS) a validated and standardized scoring system for assessing histologic severity of EoE. The pathologic features included eosinophilic inflammation (EI), basal zone hyperplasia (BZH), eosinophilic microabscess (EA), eosinophil surface layering (ESL), dilated intercellular spaces (DIS), surface epithelial alterations (SEA), dyskeratotic epithelial cells (DEC), and lamina propria fibrosis (LPF) when aLP was present (defined as > 35  $\mu$ m of thickness without crush effect). Each of these features were graded from 0 to 3 per the EoEHSS. We did not calculate the total EoEHSS score since our goal was to assess the relationship between the epithelial features and LPF (absence = 0; presence = 1 – 3).

Fragments with LP but either crushed or inadequate for evaluation of fibrosis were not included.
